# Supplementary material
Source: PubMed Central journal article supplement (PMC5270629)
Supplement: NIHMS843301-supplement-Supp.pdf [file NIHMS843301-supplement-Supp.pdf]

## Supplemental Material

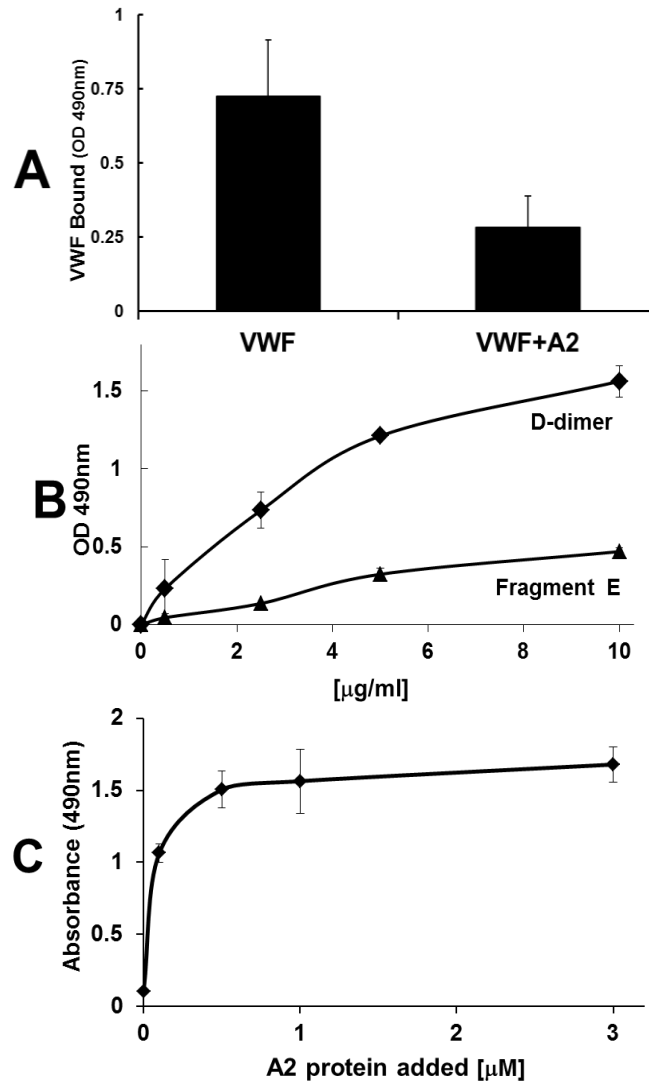

**Figure S1**

**Figure S1.** (A) Purified plasma VWF (2  $\mu\text{g/ml}$ ) containing ristocetin (0.5 mg/ml, to expose the A2 domain) and mixed with A2 protein (1.0  $\mu\text{M}$ ) or buffer was added to fibrin(ogen)-coated plates. Bound VWF was quantified as described in **figure S1**. (B) Various concentrations of soluble D-dimer or Fragment E were incubated to immobilized A2 protein. (C) Various concentrations of A2 protein were added to wells coated with fibrin monomer. Bound proteins were determined by ELISA as described before. The graphs represent one of two separated experiments. Each point represents the mean  $\pm$  SD of values obtained from a triplicate assay.

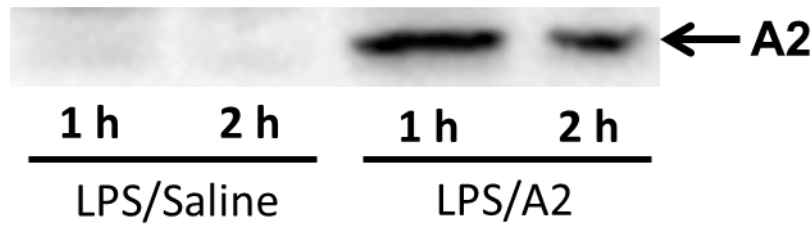

**Figure S2.** Plasma obtained from LPS-treated mice intervened with saline or A2 domain was subjected to SDS-PAGE analysis (reduced condition) and immunoblotted with anti-histidine tag HRP-antibody. The A2 domain was clearly detected in circulation the first 2 hours after its infusion.

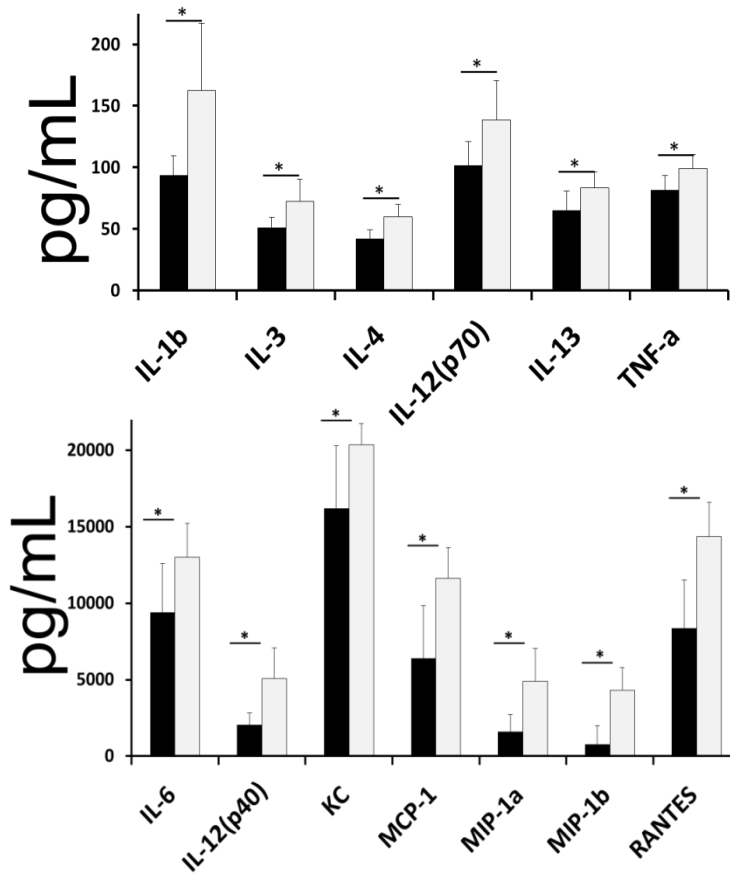

**Figure S3.** Circulating levels of inflammatory mediators. LPS-treated mice were injected with A2 protein (*black bars*, n=9) or saline (*white bars*, n=6) 1.5 hours after the challenge with LPS. Graphs show the cytokines profile at 18 hours after the LPS insult using Bioplex. (\*p<0.05).

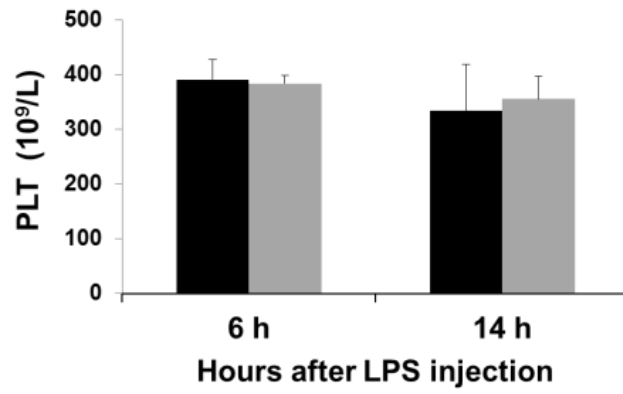

**Figure S4.** Platelet counts similarly dropped from  $\sim 700 \times 10^9/L$  at 6 and 14 hours after the injection of endotoxin in mice treated with A2 protein (gray bars) or saline (black bars). Graph show the mean  $\pm$  SD of values obtained from three mice per group/time.
